# Supplementary material for: Long-term hematopoietic transfer of the anti-cancer and lifespan-extending capabilities of a genetically engineered blood system by transplantation of bone marrow mononuclear cells
Source: eLife journal article supplement (doi:10.7554/elife.88275), 2023-07-05

**Figure 4-figure supplement 2A**

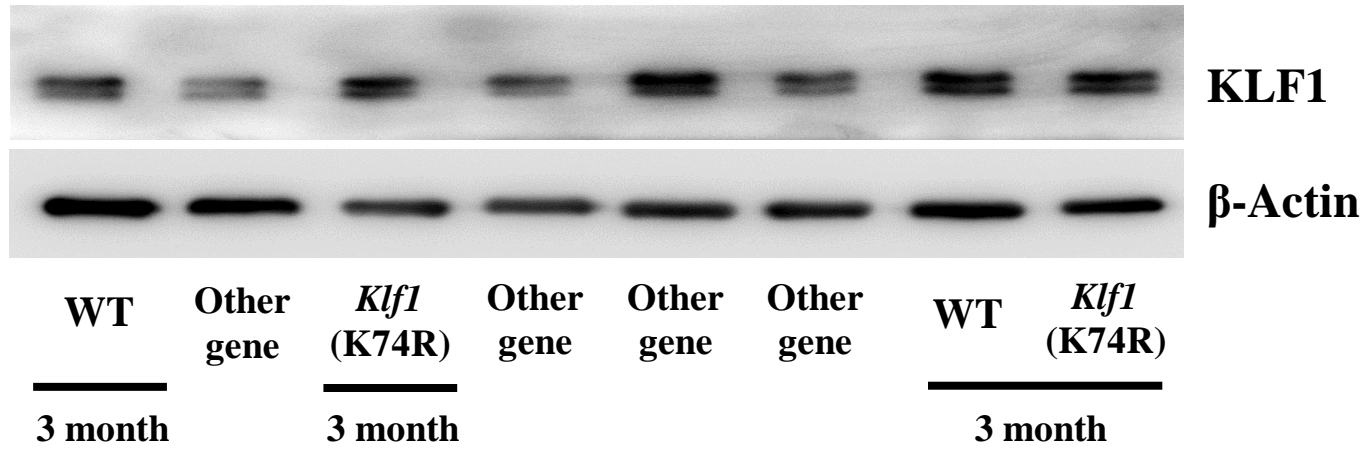

**Figure 4-figure supplement 2A**

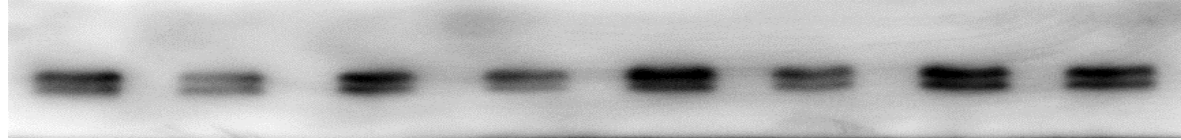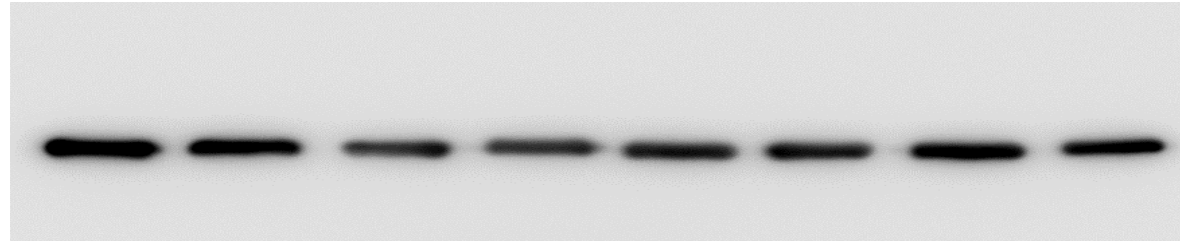

Supplement: fig4-figsupp2-data1 [file elife-88275-fig4-figsupp2-data1-v1.pdf]
