# Supplementary material for: Long-term hematopoietic transfer of the anti-cancer and lifespan-extending capabilities of a genetically engineered blood system by transplantation of bone marrow mononuclear cells
Source: eLife journal article supplement (doi:10.7554/elife.88275), 2023-07-05
Supplement: fig4-figsupp2-data2 [file elife-88275-fig4-figsupp2-data2-v3.pdf]

Figure 4-figure supplement 2B

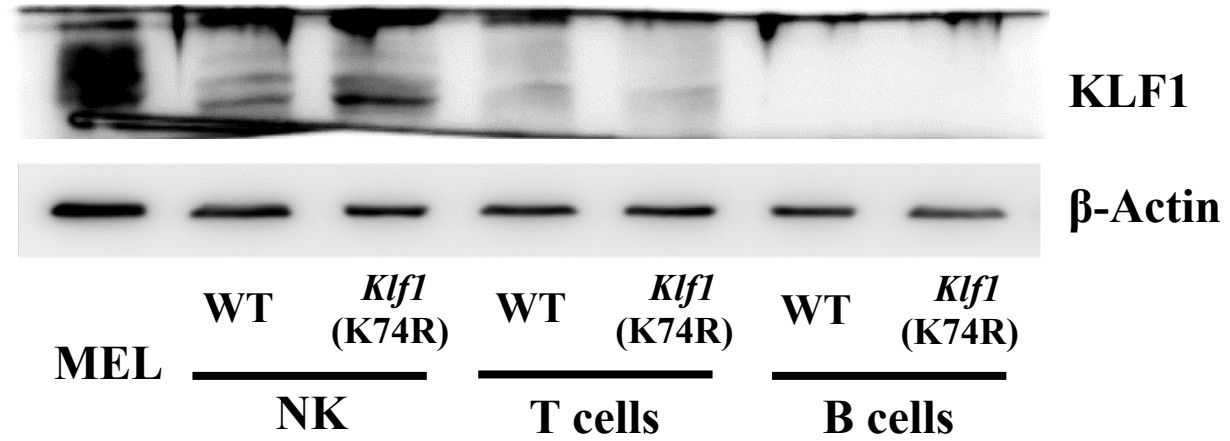

Bright Field

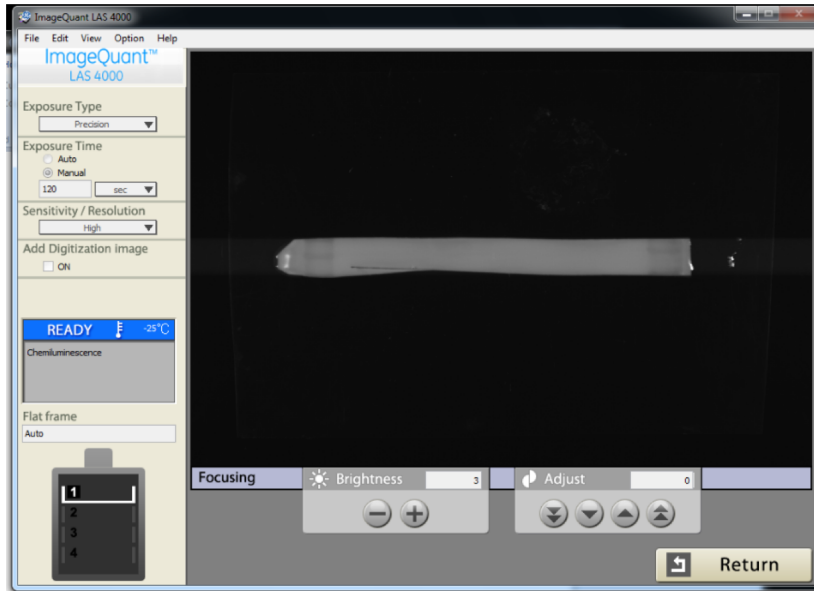

KLF-1

WB

Figure 4-figure supplement 2B

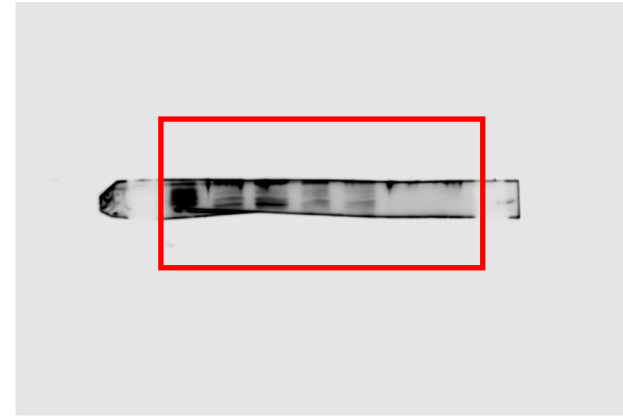

MEL WT *Klf1* WT *Klf1* WT *Klf1*  
 (K74R) (K74R) (K74R) (K74R)  
 NK T cells B cells

Bright Field

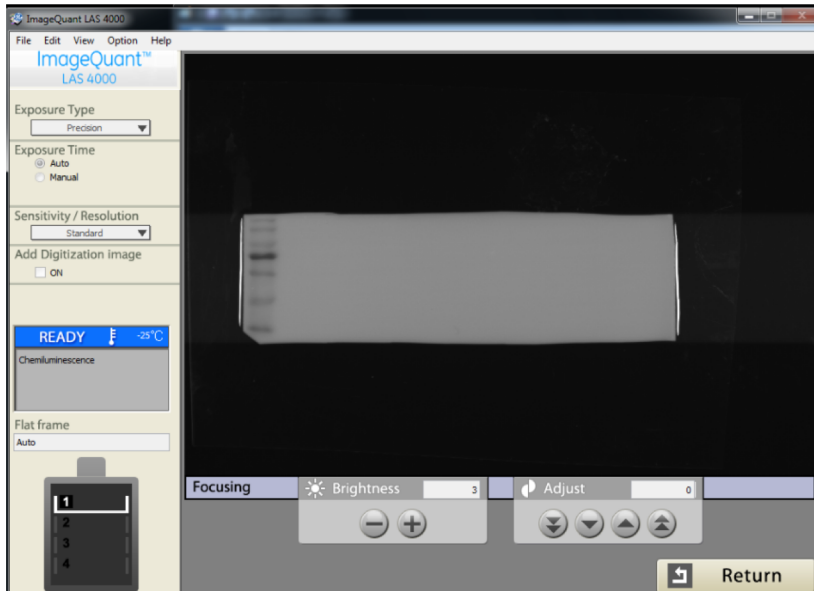

$\beta$ -Actin

WB

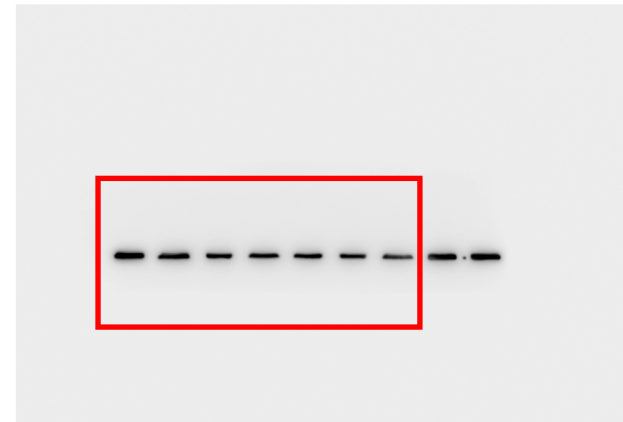

MEL WT *Klf1* WT *Klf1* WT *Klf1* Other Other  
 (K74R) (K74R) (K74R) (K74R) (K74R) (K74R) gene gene  
 NK T cells B cells

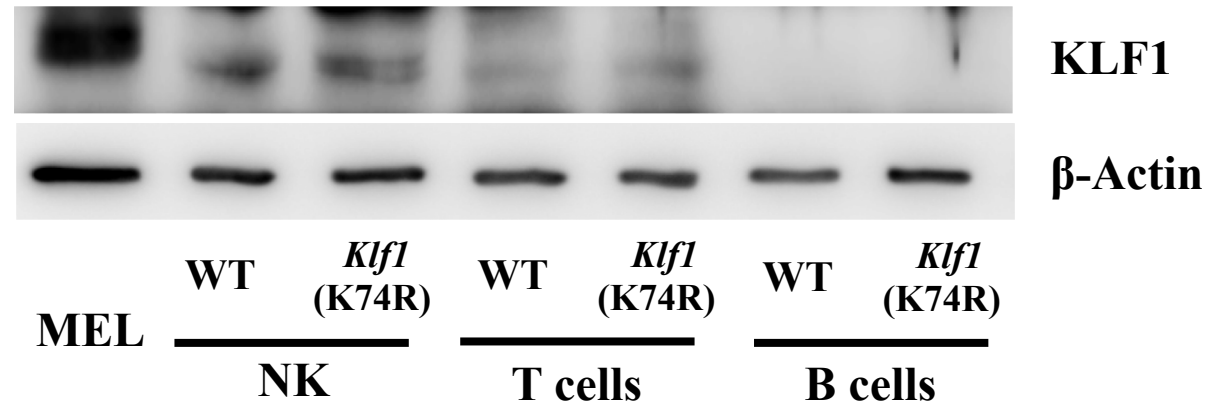

Bright Field

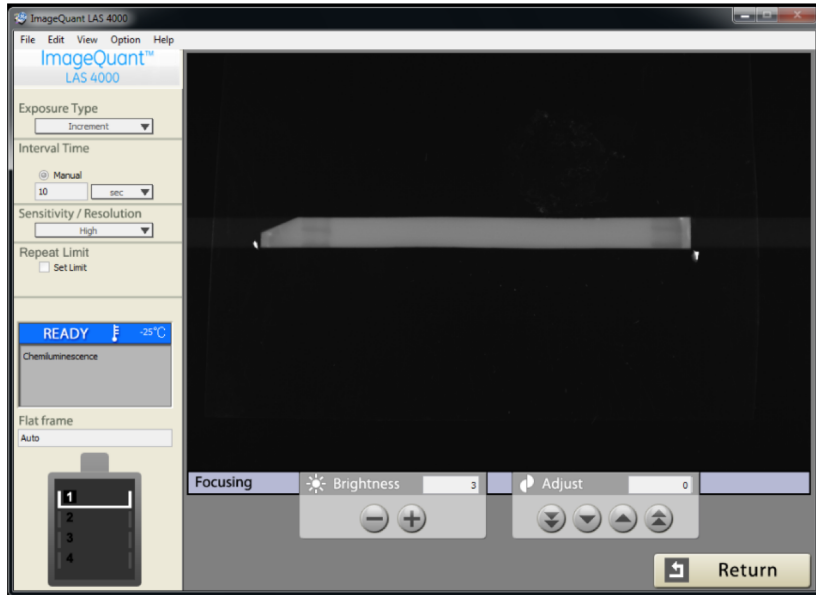

KLF-1

WB

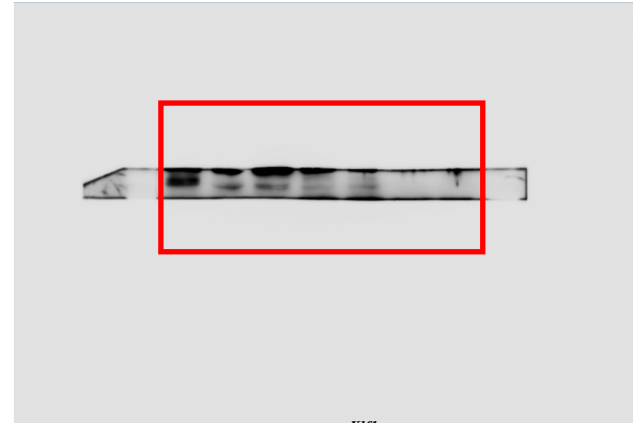

|     |    |             |         |             |         |             |
|-----|----|-------------|---------|-------------|---------|-------------|
| MEL | WT | <i>Klf1</i> | WT      | <i>Klf1</i> | WT      | <i>Klf1</i> |
|     |    | (K74R)      |         | (K74R)      |         | (K74R)      |
|     | NK |             | T cells |             | B cells |             |

Bright Field

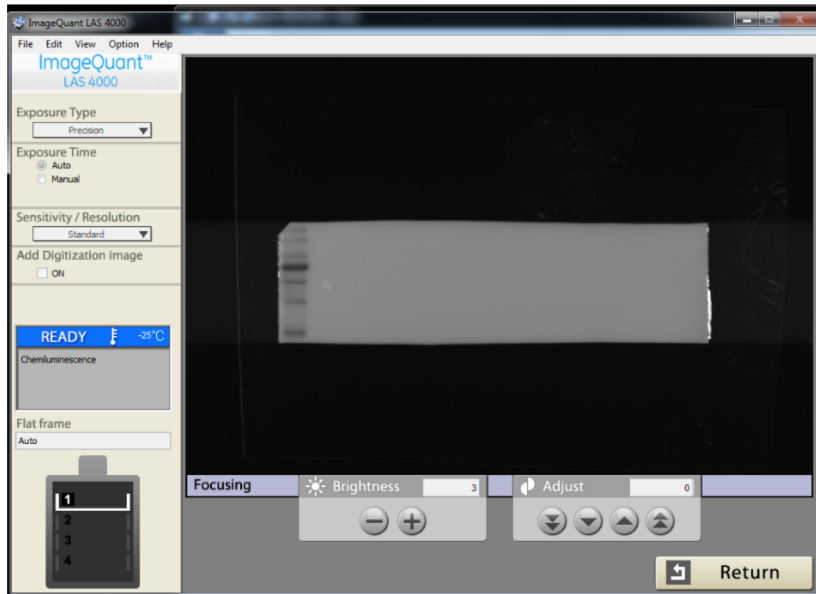

$\beta$ -Actin

WB

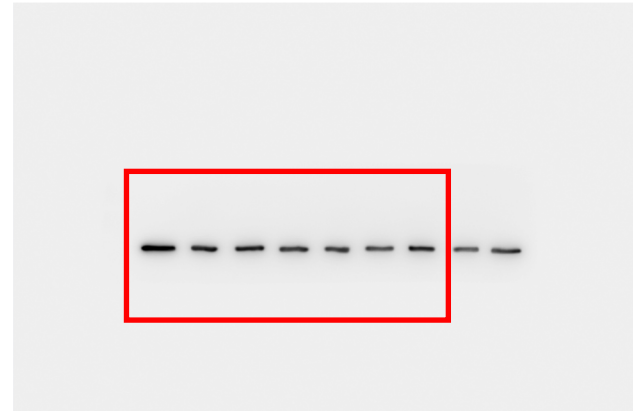

|     |    |             |         |             |         |             |       |       |
|-----|----|-------------|---------|-------------|---------|-------------|-------|-------|
| MEL | WT | <i>Klf1</i> | WT      | <i>Klf1</i> | WT      | <i>Klf1</i> | Other | Other |
|     |    | (K74R)      |         | (K74R)      |         | (K74R)      | gene  | gene  |
|     | NK |             | T cells |             | B cells |             |       |       |
