# Supplementary material for: Long-term hematopoietic transfer of the anti-cancer and lifespan-extending capabilities of a genetically engineered blood system by transplantation of bone marrow mononuclear cells
Source: eLife journal article supplement (doi:10.7554/elife.88275), 2023-07-05
Supplement: supp1 [file Supplementary file 1a.xlsx]

## Sheet: 工作表1
Supplementary file 1a
Marker	Cell types
CD45R+/CD3e-	B cells
CD45R-/CD3e+	T cells
CD45R-/CD3e-/NK1.1+/NKp46+	NK cells
CD11b+/Gr-1-	Monocytes
CD11b+/Gr-1+	Granulocytes
