# Supplementary material for: Long-term hematopoietic transfer of the anti-cancer and lifespan-extending capabilities of a genetically engineered blood system by transplantation of bone marrow mononuclear cells
Source: eLife journal article supplement (doi:10.7554/elife.88275), 2023-07-05
Supplement: supp1 [file Supplementaryfile1b.xlsx]

## Sheet: 工作表1
Supplementary file 1b
ChIP-qPCR primers	Sequence 5’ à 3’
Actb+668L	5’-GAC TAC CTC ATG AAG ATC CTG AC-3’
Actb+817	5’-CAG GGA AGA AGA GGA TGC GGC C-3’
βmajor-6411	5’-GTT CTC TGC ACA GAT AAG GAC AAA C-3’
βmajor-6623	5’-CTG ATC CTA CCT CAC CTT ATA TGC-3’
Pd-1-d-F	5’-GAC CTA GAA ATT GAG TCT AC-3’
Pd-1-d-R	5’-CTC TTA AGG CTT TTC TTC CTT TC-3’
Pd-1 Box1-F	5’-GTA CCA AAG CCA GGC CTC GAC-3’
Pd-1 Box1-R	5’-CCT CCT GTG GGT AGG TTT GG-3’
Pd-1 Box2-F	5’-CTC CCC CAC CTC TAG TTG C-3’
Pd-1 Box2-R	5’-GGC AGA GTT GTC TGT AGC G-3’
